# Supplementary material for: Highly porous carbon nanofiber electrodes for vanadium redox flow batteries
Source: Royal Society of Chemistry journal article supplement (doi:10.1039/d1nr08376g), 2022-01-01
Supplement: d1nr08376g1.pdf [file d1nr08376g1.pdf]

## Supporting Information

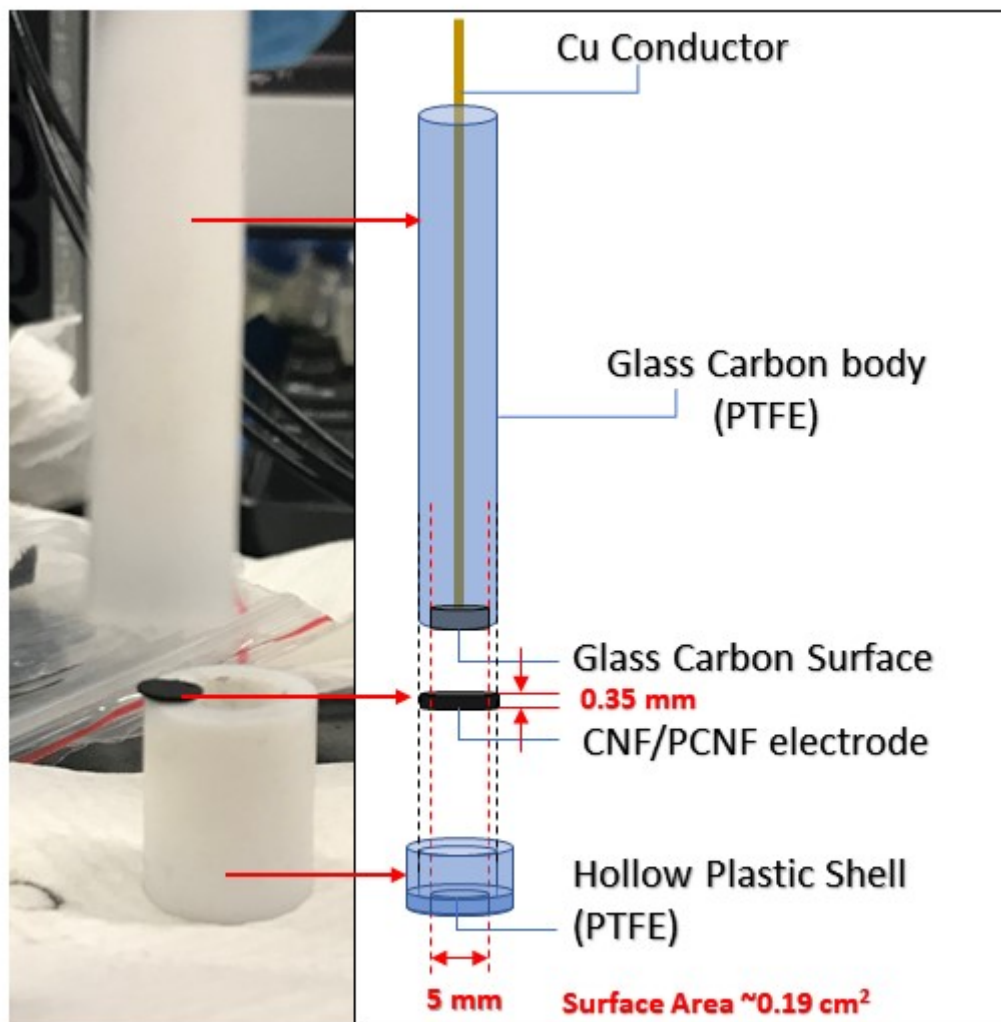

Fig. S1 Schematic illustration of CNF electrode assembled in a glass carbon working electrode.

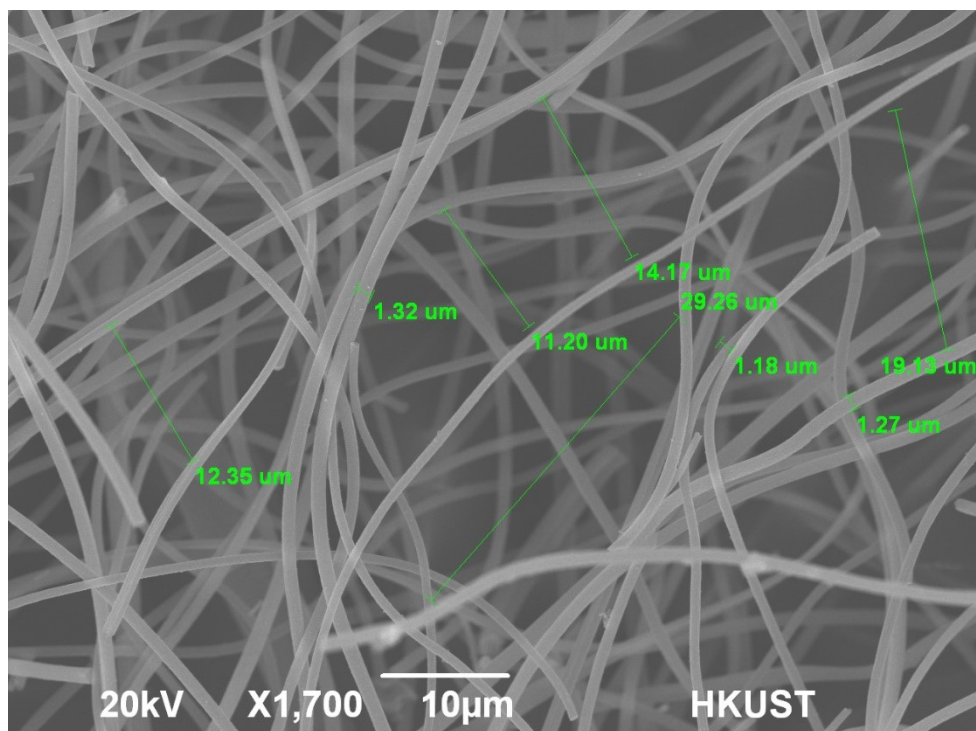

Fig. S2. Measurement of open voids between nanofibers in CNF-1100.

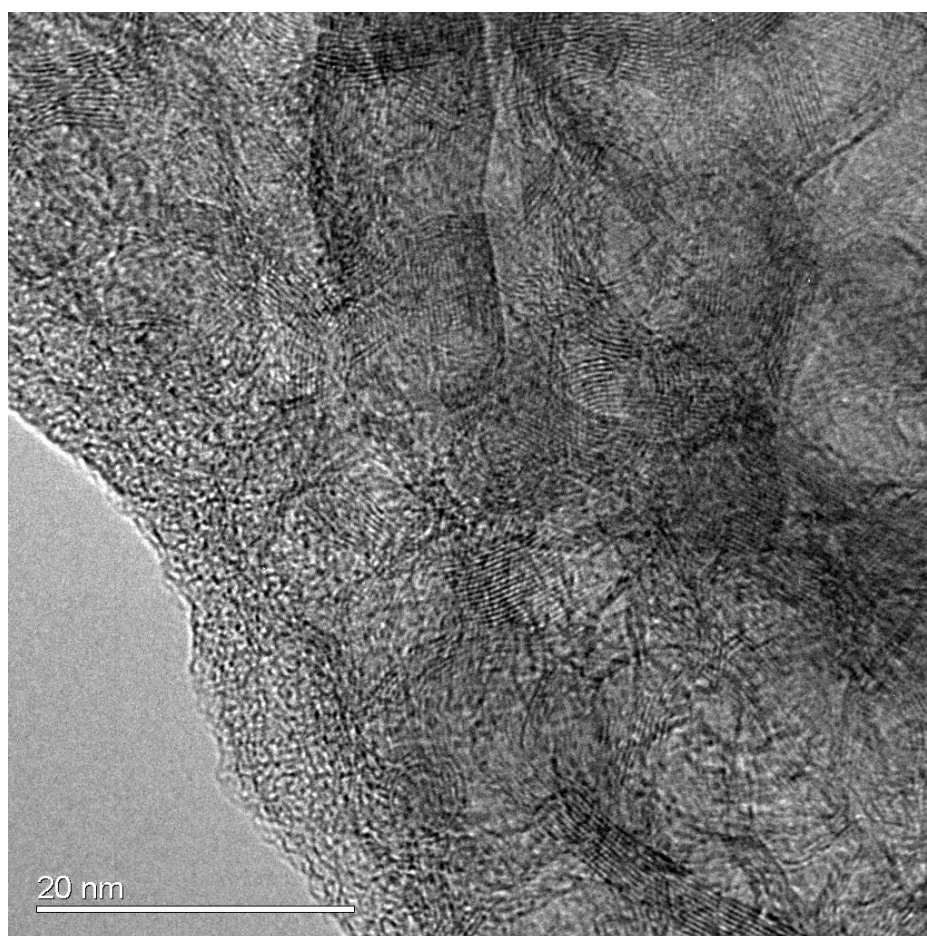

Fig. S3. HRTEM image of PCNF containing interconnected graphitic carbon layers.

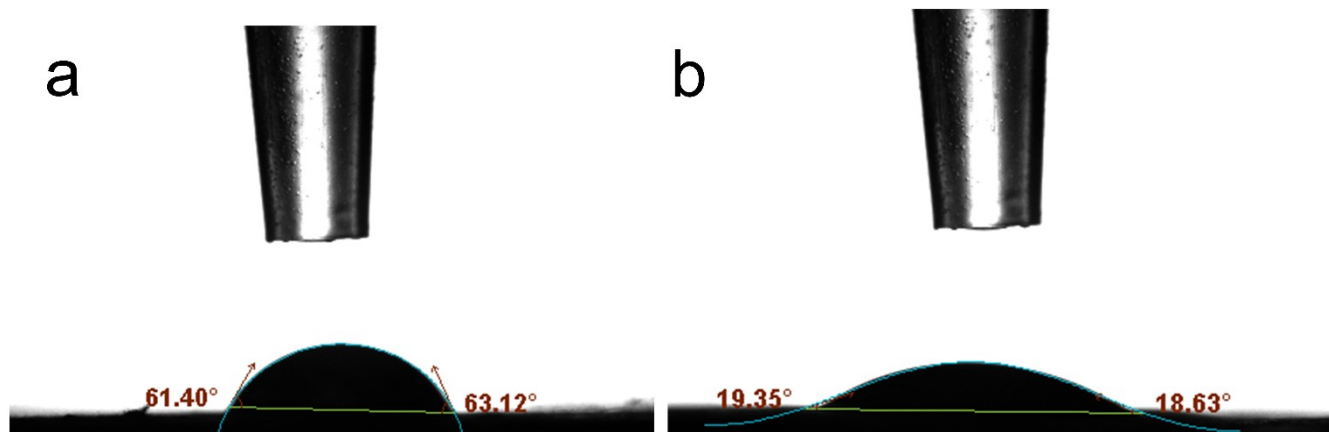

Fig. S4 Contact angles of 1 M V(IV) + 3 M H<sub>2</sub>SO<sub>4</sub> electrolyte on a PCNF (a) before and (b) after HNO<sub>3</sub> treatment.

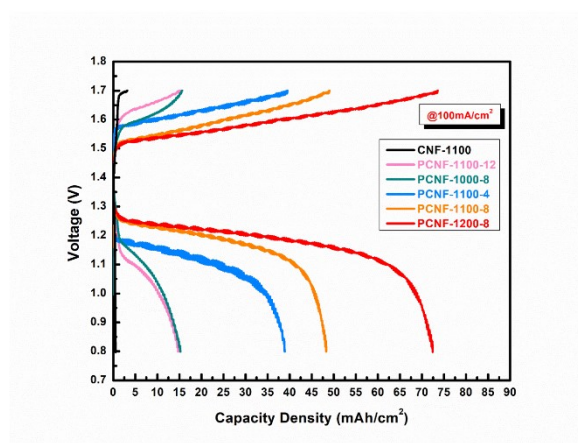

Fig. S5 Charge/discharge voltage-capacity density curves of different electrodes measured at a current density of 100 mA/cm<sup>2</sup>.

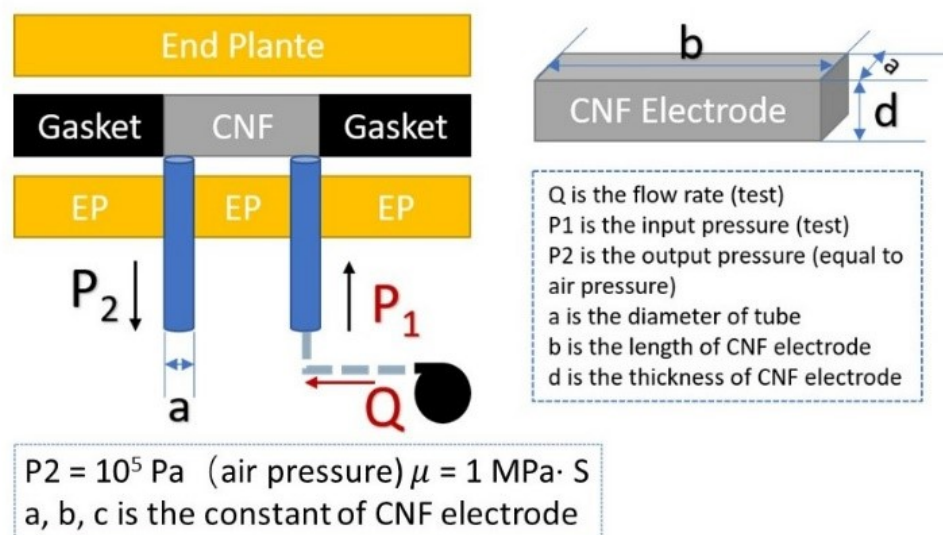

Fig. S6 Schematic illustration of permeability measurement device and test details

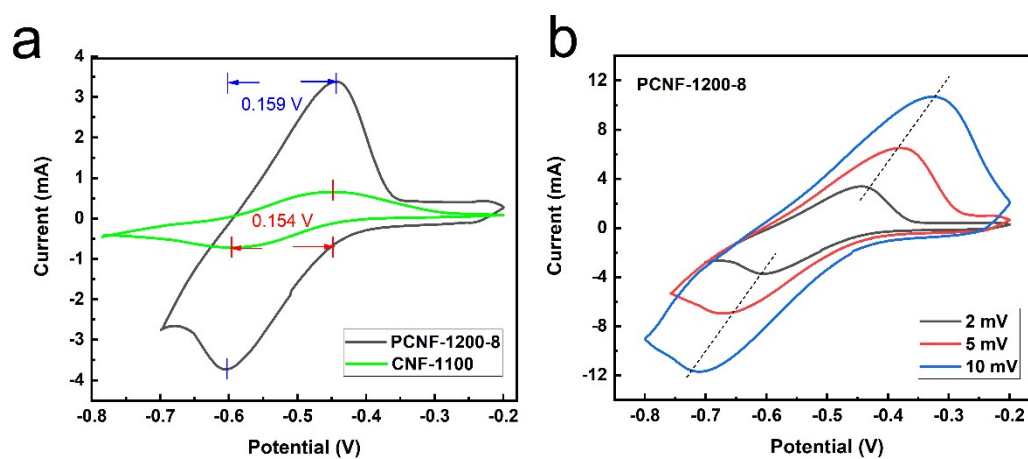Fig. S7 CV profiles obtained in 0.1 M V(III) + 3 M  $\text{H}_2\text{SO}_4$  (a) of the CNF-1100 and PCNF-1200-8 electrodes at 2 mV and (b) of the PCNF-1200-8 electrodes at different scan rates.

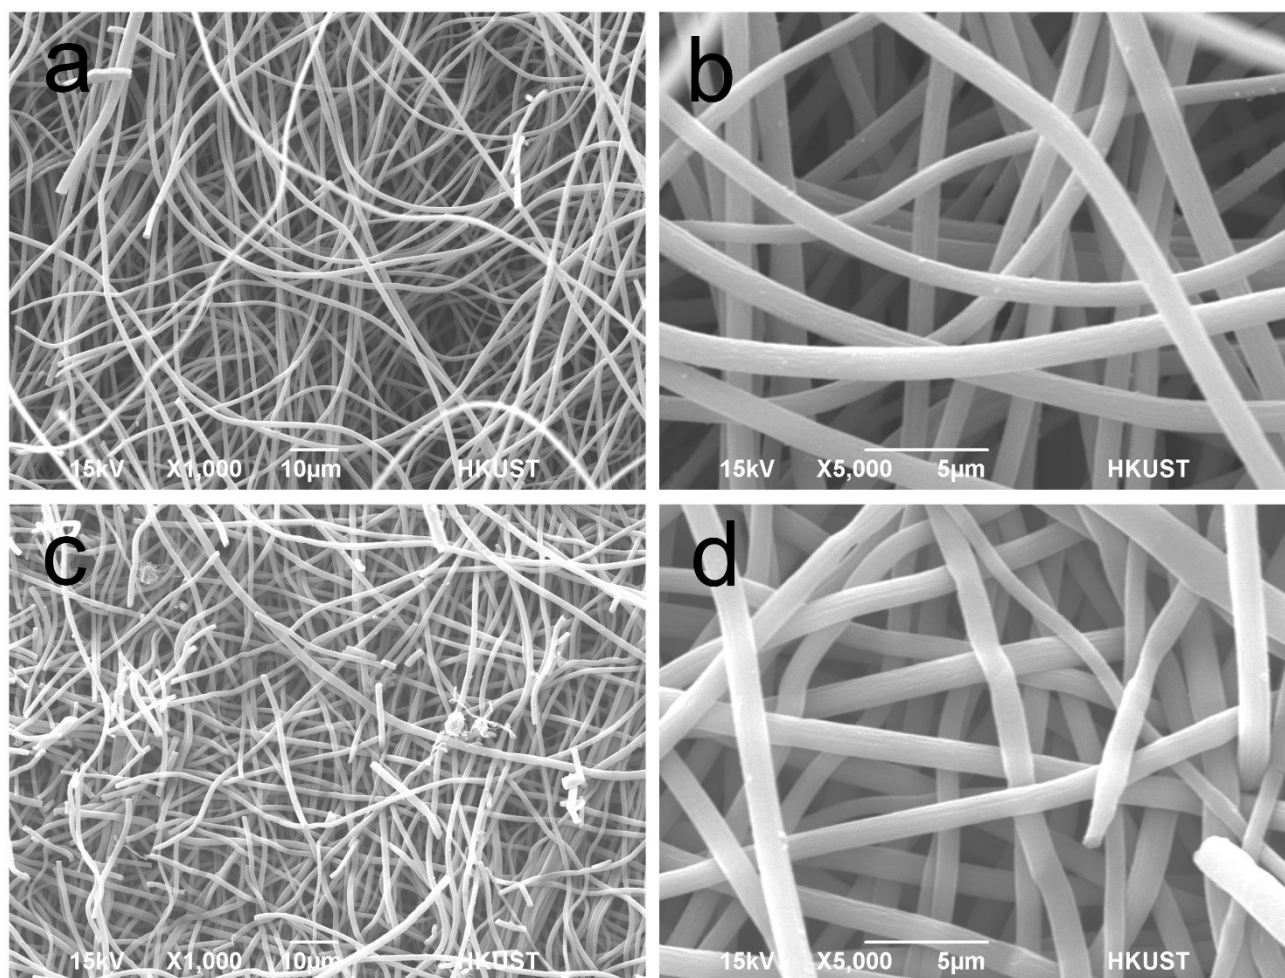

Fig. S8 SEM image of PCNF-1200-8: (a, b) before the assembly into batteries and (c, d) after 500 cycles in the VRFB full-cell test.

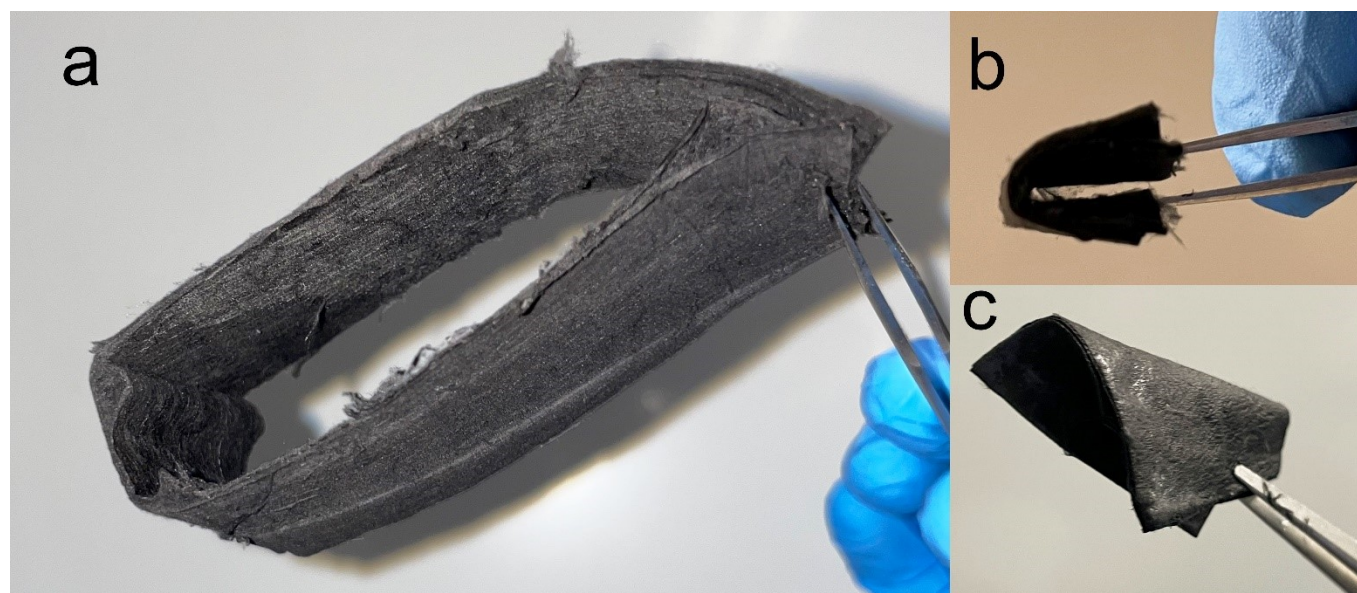

Fig. S9 Optical images of (a) bulk PCNF-1200-8 sample; (b) PCNF-1200-8 electrode before assembly into a battery; and (c) after 100 cycles in the VRFB full-cell test.

Table S1 Comparison of permeability,  $\Delta P$ .

| Materials                          | $\Delta P$ (kPa) | Q (ml/min) | K (m <sup>2</sup> )   | Darcy's law                                                           |
|------------------------------------|------------------|------------|-----------------------|-----------------------------------------------------------------------|
| PCNF                               | 47               | 48.5       | 3.2*10 <sup>-13</sup> | $Q = \frac{k * b * d}{u * a} (P1 - P2) = \frac{k * b * d}{u * a} * P$ |
| GDL 39AA (commercial carbon paper) | 230              | 1.8        | 1.5*10 <sup>-12</sup> |                                                                       |

Table S2 Atomic and mass concentrations of PCNF-1200-8 determined by XPS analysis.

| Elements                 | Fe 2p | O 1s  | N 1s | C 1s  |
|--------------------------|-------|-------|------|-------|
| Atomic Concentration (%) | 0.12  | 10.68 | 1.50 | 87.69 |
| Mass concentration (%)   | 0.55  | 13.65 | 1.68 | 84.12 |

Table S3. Comparison of energy efficiencies between PCNF-1200-8 and commercial carbon electrodes taken from the literature.

| Electrode materials                             | Current density (mA/cm <sup>2</sup> ) | Energy efficiency (%) | Ref.          |
|-------------------------------------------------|---------------------------------------|-----------------------|---------------|
| PCNF-1200-8                                     | 80                                    | 82.5                  | Current study |
|                                                 | 100                                   | 79.3                  |               |
|                                                 | 120                                   | 76.3                  |               |
|                                                 | 150                                   | 71.6                  |               |
| Carbon felts (3.0 cm × 4.5 cm, Liaoning JinGu)  | 200                                   | 60                    | 11            |
|                                                 | 360                                   | 55                    | 13            |
|                                                 | 380                                   | 50                    | 19            |
| Commercial carbon felts (1.0 cm × 2.5 cm)       | 80                                    | 78                    | 17            |
| Commercial carbon felts (13.5 cm <sup>2</sup> ) | 360                                   | 51                    | 18            |
